# Supplementary material for: The nature of the C–Br⋯Br–C intermolecular interactions found in molecular crystals: a general theoretical-database study
Source: Royal Society of Chemistry journal article supplement (doi:10.1039/c5ce00272a), 2015-01-01
Supplement: c5ce00272a1.pdf [file c5ce00272a1.pdf]

## Electronic Supplementary Material (ESI) for CrystEngComm

This journal is © The Royal Society of Chemistry 2015

# The nature of the C-Br $\cdots$ Br-C intermolecular interactions found in molecular crystals: A general theoretical-database study

Marçal Capdevila-Cortada <sup>a,b</sup> and Juan J. Novoa <sup>\*a</sup>

<sup>a</sup> Departament de Química Física and IQTCUB, Facultat de Química, Universitat de Barcelona, Av. Diagonal 645, 08028 Barcelona (Spain)

<sup>b</sup> Current address: Institute of Chemical Research of Catalonia (ICIQ), Av. Països Catalans 16, 43007 Tarragona (Spain)  
E-mail: juan.novoa@ub.edu

### Contents:

- **Figure S1.** Intermolecular C-Br $\cdots$ Br-C interactions found in the ten crystals presenting the shortest Br $\cdots$ Br interactions (see Table S1), as well as in structure number 20, 30, 40, 50 60 70 80, 90 and 100 of Table S1. Each crystal is identified by its refcode. In some crystals (for instance, DBRDOX, DANZIC, and ZILNIT), in order to better visualize the position and superstructure of the C-Br functional groups and the C-Br $\cdots$ Br-C interactions shorter than 5 Å among them, only the C-Br groups are plotted.
- **Figure S2.** Distribution of the <C-Br1 $\cdots$ Br2 and <C-Br2 $\cdots$ Br1 angles (in degrees) as a function of the Br $\cdots$ Br distance (in Å).
- **Figure S3.** Probability distribution for the < C-Br $\cdots$ Br angles, computed for the set of C-Br $\cdots$ Br-C contacts found in the CSD that have a Br $\cdots$ Br distance smaller than 4.5 Å.
- **Figure S4.** Distribution of the Br $\cdots$ Br distance and <C-Br $\cdots$ Br angle for Table 4 dimers.

**Table S1.** Value of the Br $\cdots$ Br distance (Br $\cdots$ Br<sub>1</sub>, in Å), the <C-Br1 $\cdots$ Br2 (ANG1), and <C-Br2 $\cdots$ Br1 (ANG2) angles (both in degrees) for the shortest 100 C-Br $\cdots$ Br-C contacts found in the Cambridge Crystallographic Database (all Br $\cdots$ Br values are within the 3.07 and 3.40 Å range). Also given is the difference between the ANG1 and ANG2 angles, which allows to determine if the contact is of the Type I class, and the values of the Br $\cdots$ Br distance (Br $\cdots$ Br<sub>2</sub>, in Å) and <C-Br1 $\cdots$ Br2 angle (ANG3, in degrees) for the second shortest C-Br $\cdots$ Br-C contact (see Figure S1 to determine the relative disposition of the shortest and the next C-Br $\cdots$ Br-C contacts within the crystal).

**Table S2.** Proportion of symmetric C-Br $\cdots$ Br-C interactions (i.e., those that have their <C-Br1 $\cdots$ Br2 angle equal to the <C-Br2 $\cdots$ Br1 angle) for contacts whose Br $\cdots$ Br distance is smaller than the indicated cutoff

- **Table S3.** Cartesian coordinates of all optimized dimers .computed in this paper

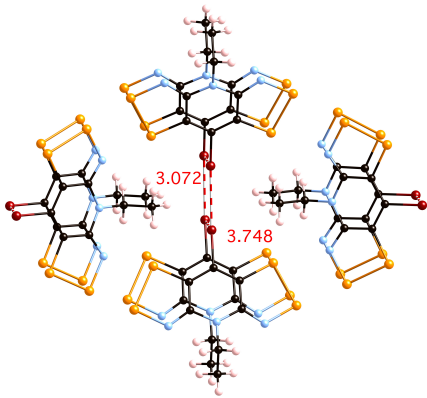

**IZOXOL04**

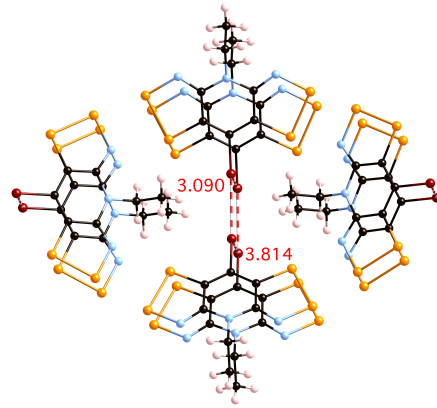

**IZOXOL03**

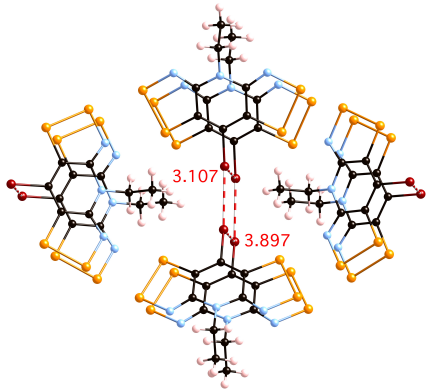

**IZOXOL02**

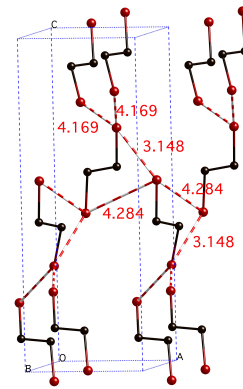

**DBRDOX**

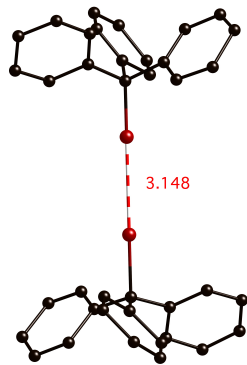

**TPHMBR01**

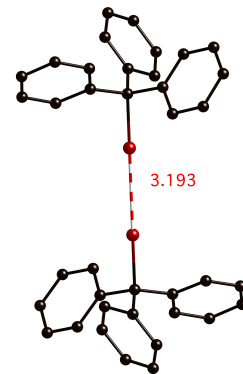

**TPHMBR02**

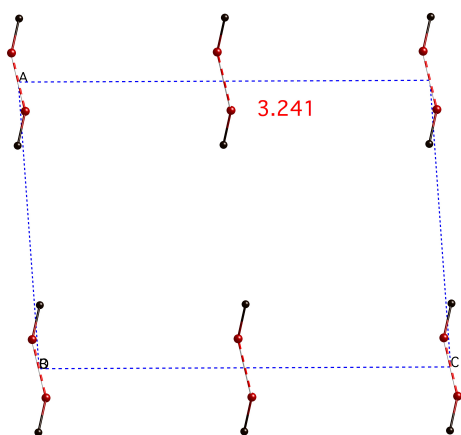

**DANZIC**

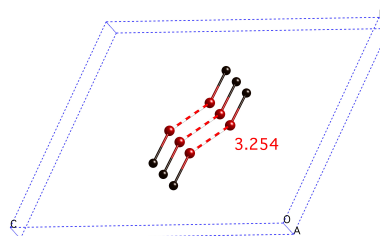

**ZILNIT**

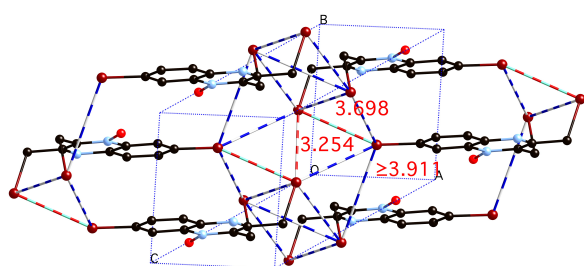

**NIGZIL**

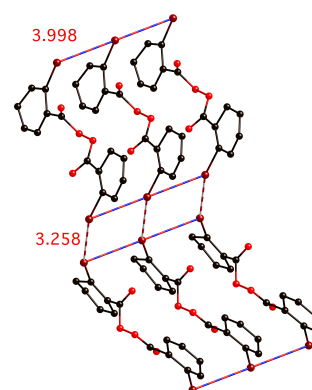

**DBBZPO**

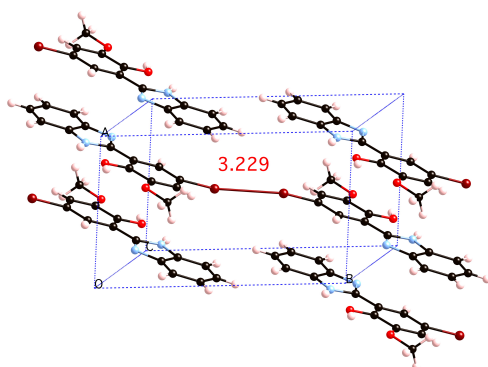

**SACJAJ**

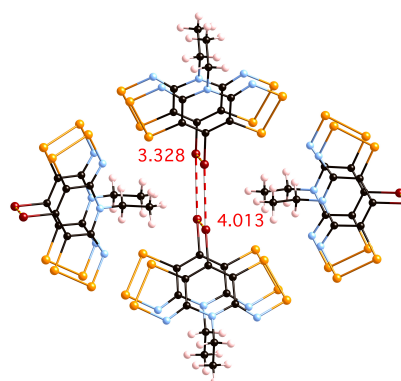

**IZOXOL01**

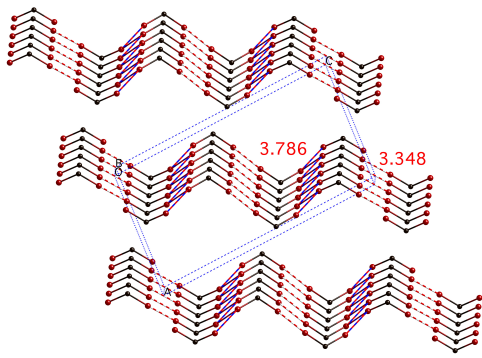

**PUJRAO**

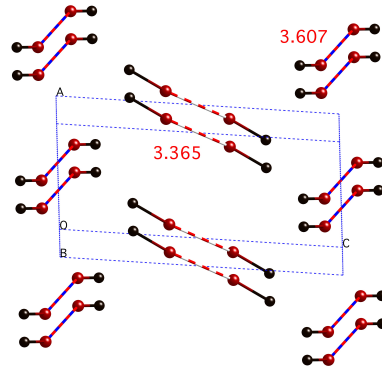

**CEPVID**

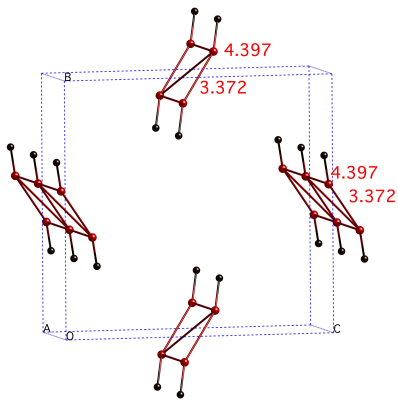

**BAPRER**

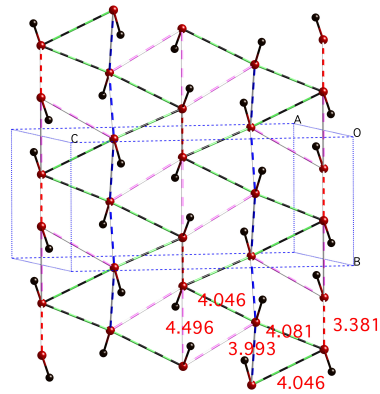

**RUPSAW**

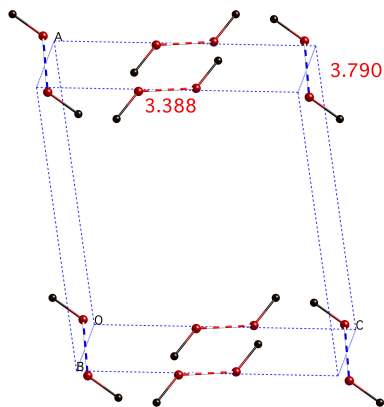

**BPPHOX**

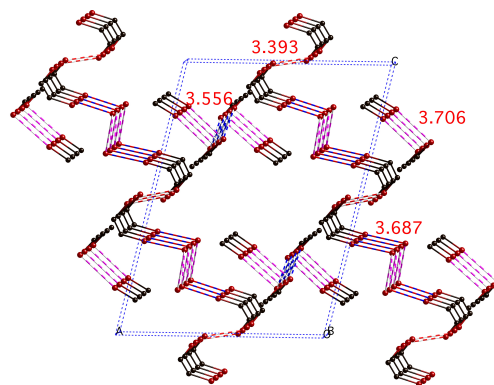

**YUNWUA**

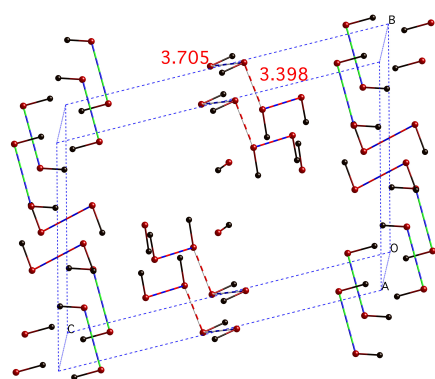

### LOGNIF

**Figure S1.** Intermolecular C-Br...Br-C interactions found in the ten crystals presenting the shortest Br...Br interactions (see Table S1), as well as in structure number 20, 30, 40, 50 60 70 80, 90 and 100 of Table S1. Each crystal is identified by its refcode. In some crystals (for instance, DBRDOX, DANZIC, and ZILNIT), in order to better visualize the position and superstructure of the C-Br functional groups and the C-Br...Br-C interactions shorter than 5 Å among them, only the C-Br groups are plotted.

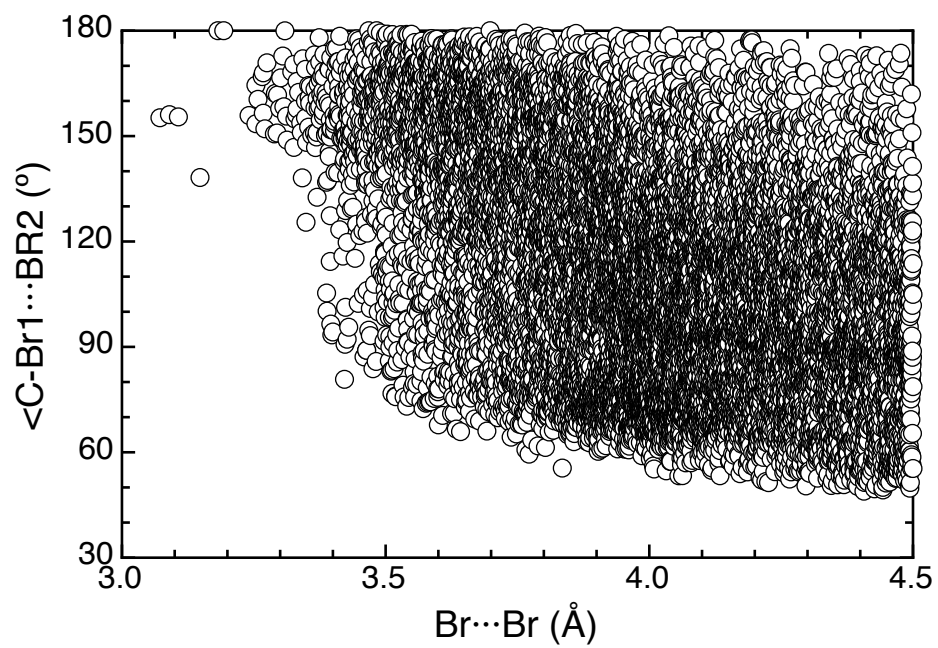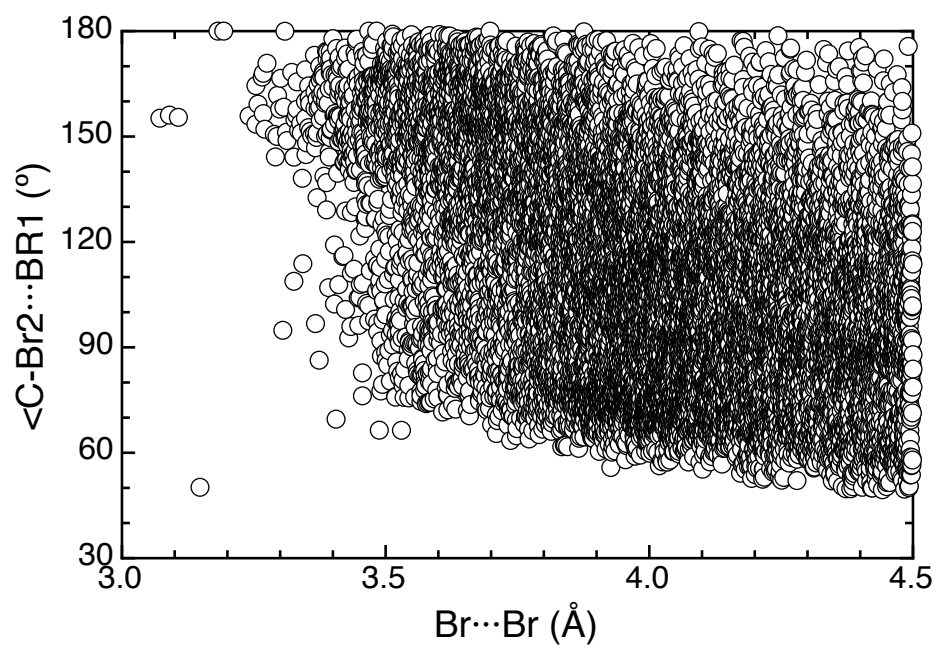

**Figure S2.** Distribution of the  $\langle \text{C-Br1}\cdots\text{Br2} \rangle$  (top) and  $\langle \text{C-Br2}\cdots\text{Br1} \rangle$  (bottom) angles as a function of the  $\text{Br}\cdots\text{Br}$  distance.

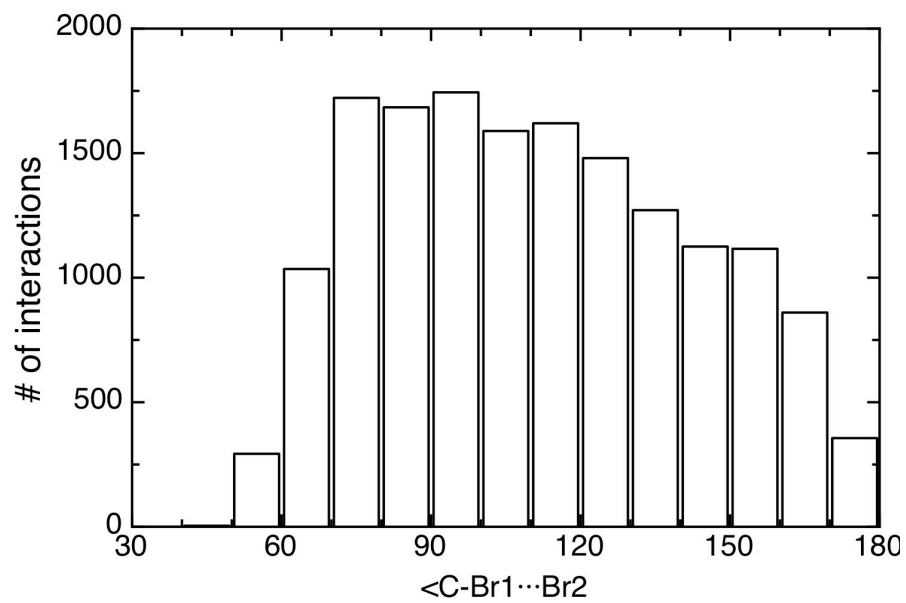

**Figure S3.** Probability distribution for the  $\angle$  C-Br...Br angles, computed for the set of C-Br...Br-C contacts found in the CSD that have a Br...Br distance smaller than 4.5 Å.

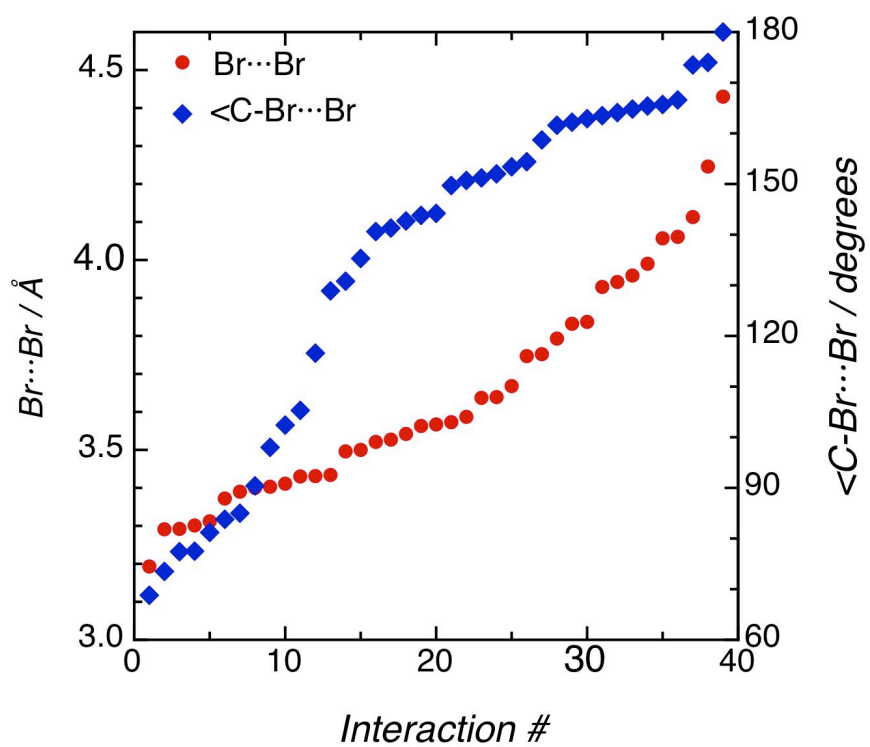

**Figure S4.** Distribution of the Br...Br distance and <C-Br...Br angle for Table 4 dimers.



**Table S1.** Value of the Br...Br distance (Br...Br<sub>1</sub>, in Å), the <C-Br1...Br2 (ANG1), and <C-Br2...Br1 (ANG2) angles (both in degrees) for the shortest 100 C-Br...Br-C contacts found in the Cambridge Crystallographic Database (all Br...Br values are within the 3.07 and 3.40 Å range). Also given is the difference between the ANG1 and ANG2 angles, which allows to determine if the contact is of the Type I class, and the values of the Br...Br distance (Br...Br<sub>2</sub>, in Å) and <C-Br1...Br2 angle (ANG3, in degrees) for the second shortest C-Br...Br-C contact (see Figure S1 to determine the relative disposition of the shortest and the next C-Br...Br-C contacts within the crystal).

| #  | REFCODE  | Br...Br <sub>1</sub> | ANG1  | ANG2  | ANG1-ANG2 | Br...Br <sub>2</sub> | ANG3  |   |
|----|----------|----------------------|-------|-------|-----------|----------------------|-------|---|
| 1  | IZOXOL04 | 3.072                | 155.2 | 155.2 | 0.0       | 3.748                | 114.7 | a |
| 2  | IZOXOL03 | 3.090                | 156.1 | 156.1 | 0.0       | 3.814                | 113.9 | a |
| 3  | IZOXOL02 | 3.107                | 155.5 | 155.5 | 0.0       | 3.897                | 114.5 | a |
| 4  | DBRDOX   | 3.148                | 138.2 | 50.2  | 88.0      | 4.169                | 141.0 |   |
| 5  | TPHMBR01 | 3.182                | 180.0 | 180.0 | 0.0       | > 5 Å                |       | b |
| 6  | TPHMBR02 | 3.193                | 180.0 | 180.0 | 0.0       | > 5 Å                |       | b |
| 7  | DANZIC   | 3.241                | 155.9 | 155.9 | 0.0       | > 5 Å                |       | b |
| 8  | ZILNIT   | 3.254                | 153.5 | 153.5 | 0.0       | > 5 Å                |       | b |
| 9  | NIGXIL   | 3.254                | 164.5 | 164.5 | 0.0       | 3.698                | 96.4  |   |
| 10 | DBBZPO   | 3.258                | 160.5 | 159.2 | 1.3       | 3.998                | 69.3  |   |
| 11 | ESIWUY01 | 3.266                | 166.9 | 166.9 | 0.0       |                      |       |   |
| 12 | APATOB   | 3.268                | 168.0 | 168.0 | 0.0       |                      |       |   |
| 13 | EHINEP   | 3.268                | 156.5 | 156.5 | 0.0       |                      |       |   |
| 14 | POXZOR   | 3.271                | 152.1 | 152.1 | 0.0       |                      |       |   |
| 15 | DISWIN   | 3.275                | 170.9 | 170.9 | 0.0       |                      |       |   |
| 16 | GUJSIN   | 3.289                | 150.6 | 150.6 | 0.0       |                      |       |   |
| 17 | QAQLUQ   | 3.291                | 162.2 | 144.2 | 18.0      |                      |       |   |
| 18 | QECGEM   | 3.294                | 150.9 | 150.0 | 0.8       |                      |       |   |
| 19 | YOZLII   | 3.295                | 161.7 | 161.7 | 0.0       |                      |       |   |
| 20 | SACJAJ   | 3.299                | 157.8 | 157.8 | 0.0       | > 5 Å                |       | b |
| 21 | YIHDEY   | 3.301                | 166.6 | 166.6 | 0.0       |                      |       |   |
| 22 | OHIKUL   | 3.305                | 172.8 | 94.9  | 77.9      |                      |       |   |
| 23 | SACJAJ01 | 3.307                | 158.3 | 158.3 | 0.0       |                      |       |   |
| 24 | ZERJIP   | 3.309                | 180.0 | 180.0 | 0.0       |                      |       |   |
| 25 | BAWJAL   | 3.312                | 155.7 | 151.2 | 4.5       |                      |       |   |
| 26 | IPEXAD   | 3.313                | 148.9 | 148.9 | 0.0       |                      |       |   |
| 27 | QETVER   | 3.322                | 168.3 | 168.3 | 0.0       |                      |       |   |
| 28 | VOBCIZ   | 3.326                | 146.8 | 144.1 | 2.6       |                      |       |   |
| 29 | XEFGEW   | 3.326                | 170.4 | 108.8 | 61.6      |                      |       |   |
| 30 | IZOXOL01 | 3.328                | 154.9 | 154.9 | 0.0       | 4.013                | 115.1 | a |
| 31 | ROFLOO01 | 3.331                | 156.1 | 156.1 | 0.0       |                      |       |   |
| 32 | DUFWIL   | 3.332                | 157.7 | 157.7 | 0.0       |                      |       |   |
| 33 | GESTII   | 3.332                | 165.6 | 165.6 | 0.0       |                      |       |   |
| 34 | ERITOP   | 3.335                | 162.4 | 151.7 | 10.7      |                      |       |   |
| 35 | AFACIU   | 3.339                | 153.7 | 153.7 | 0.0       |                      |       |   |
| 36 | KEJDEI   | 3.340                | 151.0 | 151.0 | 0.0       |                      |       |   |
| 37 | SOSTUQ   | 3.342                | 138.1 | 138.1 | 0.0       |                      |       |   |
| 38 | HUDDAM   | 3.343                | 172.0 | 113.8 | 58.2      |                      |       |   |
| 39 | EQIFIU   | 3.348                | 160.0 | 160.0 | 0.0       |                      |       |   |
| 40 | PUJRAO   | 3.348                | 155.2 | 155.2 | 0.0       | 3.786                | 153.8 |   |
| 41 | VOQWAA   | 3.348                | 169.0 | 169.0 | 0.0       |                      |       |   |
| 42 | XACXEE   | 3.349                | 125.5 | 144.9 | -19.4     |                      |       |   |
| 43 | UDURAN   | 3.350                | 148.2 | 148.2 | 0.0       |                      |       |   |
| 44 | AXUKIO   | 3.354                | 164.4 | 164.4 | 0.0       |                      |       |   |
| 45 | YICDUK   | 3.354                | 152.5 | 152.5 | 0.0       |                      |       |   |
| 46 | XAZMES   | 3.355                | 160.9 | 160.9 | 0.0       |                      |       |   |
| 47 | DABPYR   | 3.356                | 159.3 | 159.3 | 0.0       |                      |       |   |

|     |          |       |       |       |       |       |       |  |
|-----|----------|-------|-------|-------|-------|-------|-------|--|
| 48  | OWECEZ   | 3.357 | 164.2 | 151.5 | 12.7  |       |       |  |
| 49  | EGIDEE   | 3.360 | 150.2 | 150.2 | 0.0   |       |       |  |
| 50  | CEPVID   | 3.365 | 173.1 | 173.1 | 0.0   | 3.607 | 158.1 |  |
| 51  | LADVOB   | 3.365 | 150.9 | 150.9 | 0.0   |       |       |  |
| 52  | TUVFEW   | 3.366 | 158.0 | 158.0 | 0.0   |       |       |  |
| 53  | YUBLUD   | 3.366 | 163.3 | 162.7 | 0.7   |       |       |  |
| 54  | CIBRAI   | 3.367 | 146.7 | 146.8 | -0.1  |       |       |  |
| 55  | OHKOF    | 3.367 | 169.5 | 96.8  | 72.8  |       |       |  |
| 56  | ARIZUX   | 3.369 | 149.7 | 149.7 | 0.0   |       |       |  |
| 57  | DBCYOC   | 3.370 | 160.7 | 160.7 | 0.0   |       |       |  |
| 58  | NUQLAN   | 3.370 | 132.6 | 132.6 | 0.0   |       |       |  |
| 59  | XAZMES   | 3.370 | 151.0 | 151.0 | 0.0   |       |       |  |
| 60  | BAPRER   | 3.372 | 157.9 | 157.9 | 0.0   | 4.372 | 117.1 |  |
| 61  | IFOKOD   | 3.372 | 164.8 | 164.8 | 0.0   |       |       |  |
| 62  | BRGUOS01 | 3.374 | 178.0 | 86.4  | 91.7  |       |       |  |
| 63  | BAGVIO   | 3.375 | 171.0 | 170.1 | 0.9   |       |       |  |
| 64  | ROFFIC   | 3.375 | 158.5 | 158.5 | 0.0   |       |       |  |
| 65  | GUCRUR   | 3.376 | 166.1 | 166.1 | 0.0   |       |       |  |
| 66  | RIQHIJ   | 3.376 | 154.6 | 154.6 | 0.0   |       |       |  |
| 67  | KIKPUQ   | 3.377 | 161.8 | 161.8 | 0.0   |       |       |  |
| 68  | GURLIP   | 3.379 | 167.1 | 167.1 | 0.0   |       |       |  |
| 69  | NUWKIA   | 3.380 | 160.9 | 160.9 | 0.0   |       |       |  |
| 70  | RUPSAW   | 3.381 | 162.8 | 162.8 | 0.0   | 3.993 | 98.5  |  |
| 71  | JAWXAG   | 3.382 | 168.5 | 168.5 | 0.0   |       |       |  |
| 72  | RANZIQ   | 3.382 | 155.7 | 155.7 | 0.0   |       |       |  |
| 73  | XACXEE   | 3.382 | 157.0 | 167.7 | -10.7 |       |       |  |
| 74  | ESAWUQ   | 3.383 | 166.8 | 166.8 | 0.0   |       |       |  |
| 75  | WEWWIE   | 3.383 | 173.3 | 138.7 | 34.6  |       |       |  |
| 76  | IJUSAI   | 3.385 | 159.5 | 159.5 | 0.0   |       |       |  |
| 77  | LEBRAN   | 3.386 | 150.5 | 160.2 | -9.7  |       |       |  |
| 78  | SAGKOC   | 3.386 | 150.1 | 150.1 | 0.0   |       |       |  |
| 79  | BZMOCO   | 3.387 | 162.2 | 162.2 | 0.0   |       |       |  |
| 80  | BPPHOX   | 3.388 | 136.9 | 136.9 | 0.0   | 3.790 | 109.9 |  |
| 81  | LALCEI   | 3.388 | 161.0 | 129.1 | 31.9  |       |       |  |
| 82  | QESBEW   | 3.388 | 105.3 | 174.3 | -69.0 |       |       |  |
| 83  | SEPXES   | 3.389 | 100.2 | 172.0 | -71.8 |       |       |  |
| 84  | LILBAJ   | 3.389 | 150.8 | 150.8 | 0.0   |       |       |  |
| 85  | LIKFIU   | 3.390 | 137.4 | 174.0 | -36.7 |       |       |  |
| 86  | ZIXNAX   | 3.391 | 159.5 | 159.5 | 0.0   |       |       |  |
| 87  | BHXPAM10 | 3.392 | 169.1 | 107.0 | 62.2  |       |       |  |
| 88  | EBMZDC   | 3.393 | 168.9 | 163.6 | 5.3   |       |       |  |
| 89  | IBUCEN   | 3.393 | 145.6 | 145.6 | 0.0   |       |       |  |
| 90  | YUNWUA   | 3.393 | 144.2 | 144.2 | 0.0   | 3.556 | 95.7  |  |
| 91  | NAWXIU   | 3.394 | 158.6 | 171.3 | -12.7 |       |       |  |
| 92  | JEHYAX   | 3.395 | 149.7 | 149.7 | 0.0   |       |       |  |
| 93  | KUCBEQ   | 3.395 | 154.6 | 174.1 | -19.5 |       |       |  |
| 94  | MUTRAU   | 3.395 | 127.3 | 168.2 | -40.8 |       |       |  |
| 95  | SEDRIE   | 3.395 | 114.3 | 170.0 | -55.6 |       |       |  |
| 96  | AZOF     | 3.396 | 172.4 | 172.4 | 0.0   |       |       |  |
| 97  | OHKOF    | 3.396 | 96.5  | 169.3 | -72.8 |       |       |  |
| 98  | XUQYUE   | 3.396 | 151.8 | 151.8 | 0.0   |       |       |  |
| 99  | EWUBAZ   | 3.397 | 152.1 | 152.1 | 0.0   |       |       |  |
| 100 | LOGNIF   | 3.398 | 93.4  | 167.7 | -74.2 | 3.705 | 88.4  |  |

<sup>a</sup> Crystal structure determined under pressure

<sup>b</sup> No C-Br...Br-C short contact below 5 Å other than reported in this table below 3.4 Å

**Table S2.** Proportion of symmetric C-Br $\cdots$ Br-C interactions (i.e., those that have their  $\angle$ C-Br1 $\cdots$ Br2 angle equal to the  $\angle$ C-Br2 $\cdots$ Br1 angle) for contacts whose Br $\cdots$ Br distance is smaller than the indicated cutoff.

| Cutoff      | 3.1  | 3.2  | 3.3  | 3.4  | 3.5  | 3.6  | 3.7  | 3.8  |
|-------------|------|------|------|------|------|------|------|------|
| # contacts  | 2    | 8    | 20   | 100  | 431  | 1179 | 2320 | 3705 |
| % symmetric | 1.00 | 0.88 | 0.90 | 0.77 | 0.67 | 0.51 | 0.44 | 0.40 |

**Table S3.** Cartesian coordinates of all optimized dimers computed in this paper:

(CH<sub>3</sub>Br)<sub>2</sub> (180,180)

|    |             |             |             |
|----|-------------|-------------|-------------|
| C  | -3.95880700 | 0.00014100  | -0.00086500 |
| H  | -4.31603800 | 0.18841800  | 1.00987200  |
| H  | -4.33013200 | 0.78095800  | -0.66199400 |
| H  | -4.32136700 | -0.97104100 | -0.33253800 |
| Br | -2.02861100 | -0.00004100 | -0.00039900 |
| Br | 2.02906800  | 0.00011900  | 0.00012200  |
| C  | 3.95926400  | 0.00045200  | 0.00015200  |
| H  | 4.31619000  | 0.97958800  | 0.31407700  |
| H  | 4.31621000  | -0.76338100 | 0.68848200  |
| H  | 4.31640600  | -0.22084900 | -1.00390300 |

(CH<sub>3</sub>Br)<sub>2</sub> (180,90)

|    |             |             |             |
|----|-------------|-------------|-------------|
| C  | 2.27164600  | 1.50319700  | 0.00137500  |
| H  | 1.79119100  | 1.91068200  | -0.88630100 |
| H  | 1.79904400  | 1.92232300  | 0.88784600  |
| H  | 3.32864200  | 1.76280200  | -0.01327700 |
| Br | 2.08075400  | -0.41760500 | 0.00015900  |
| Br | -1.70501600 | -0.04136900 | -0.00005000 |
| C  | -3.62578700 | 0.14983500  | -0.00003500 |
| H  | -3.87959700 | 1.20833900  | 0.00074300  |
| H  | -4.03258700 | -0.32846100 | -0.88919000 |
| H  | -4.03270500 | -0.32979500 | 0.88834700  |

(CH<sub>3</sub>Br)<sub>2</sub> (90,90)

|    |             |             |             |
|----|-------------|-------------|-------------|
| C  | -2.51892100 | 1.40821600  | -0.00112700 |
| H  | -2.11178900 | 1.86568400  | 0.89865200  |
| H  | -2.08205800 | 1.88930200  | -0.87425000 |
| H  | -3.59996700 | 1.53447800  | -0.00702600 |
| Br | -2.09400700 | -0.47319000 | -0.00037300 |
| Br | 2.09395000  | 0.47265700  | -0.00010800 |
| C  | 2.51886500  | -1.40874900 | 0.00064600  |
| H  | 2.09793700  | -1.86932900 | -0.89116200 |
| H  | 3.60054300  | -1.52960900 | 0.00084900  |
| H  | 2.09766000  | -1.86867700 | 0.89266000  |

(H<sub>2</sub>CCHBr)<sub>2</sub> (180,180)

|    |           |           |           |
|----|-----------|-----------|-----------|
| C  | 0.000000  | 0.000000  | 0.000000  |
| C  | 0.000000  | 0.000000  | 1.345300  |
| H  | 0.906600  | 0.000000  | 1.954000  |
| H  | -0.925000 | 0.000000  | -0.579500 |
| H  | 0.956400  | 0.000000  | -0.529200 |
| Br | -1.589800 | 0.000000  | 2.374500  |
| Br | -4.579000 | -0.000600 | 4.309700  |

|   |           |           |          |
|---|-----------|-----------|----------|
| C | -6.168700 | -0.000600 | 5.338900 |
| C | -6.168700 | -0.001200 | 6.684200 |
| H | -5.243700 | -0.001800 | 7.263600 |
| H | -7.125200 | -0.001200 | 7.213300 |
| H | -7.075300 | -0.000100 | 4.730100 |

(H<sub>2</sub>CCHBr)<sub>2</sub> (180,90)

|    |           |           |           |
|----|-----------|-----------|-----------|
| C  | 0.000000  | 0.000000  | 0.000000  |
| C  | 0.000000  | 0.000000  | 1.345300  |
| H  | 0.910700  | 0.000000  | 1.947900  |
| H  | -0.925500 | 0.000000  | -0.578800 |
| H  | 0.955300  | 0.000000  | -0.531400 |
| Br | -1.585800 | 0.000000  | 2.381200  |
| Br | -4.556200 | -0.000600 | 4.321500  |
| C  | -4.556400 | 1.893600  | 4.321700  |
| C  | -3.937900 | 2.621700  | 5.268800  |
| H  | -3.397600 | 2.157200  | 6.095800  |
| H  | -3.977600 | 3.712500  | 5.208500  |
| H  | -5.105300 | 2.324300  | 3.481600  |

(H<sub>2</sub>CCHBr)<sub>2</sub> (90,90)

|    |           |           |           |
|----|-----------|-----------|-----------|
| C  | 0.000000  | 0.000000  | 0.000000  |
| C  | 0.000000  | 0.000000  | 1.345600  |
| H  | 0.907800  | 0.000000  | 1.952300  |
| H  | -0.925600 | 0.000000  | -0.578600 |
| H  | 0.955900  | 0.000000  | -0.530100 |
| Br | -1.587300 | 0.000000  | 2.374500  |
| Br | -1.587300 | -3.895200 | 2.374500  |
| C  | -3.174600 | -3.895200 | 3.403500  |
| C  | -3.174600 | -3.895200 | 4.749000  |
| H  | -2.249000 | -3.895200 | 5.327600  |
| H  | -4.130600 | -3.895200 | 5.279100  |
| H  | -4.082400 | -3.895200 | 2.796700  |

(HCCBr)<sub>2</sub> (180,180)

|    |             |             |            |
|----|-------------|-------------|------------|
| C  | 0.00058000  | 5.26044300  | 0.00000000 |
| C  | 0.00015500  | 4.04085300  | 0.00000000 |
| H  | 0.00113800  | 6.32630700  | 0.00000000 |
| Br | -0.00015900 | 2.24676800  | 0.00000000 |
| Br | -0.00015900 | -2.24676800 | 0.00000000 |
| C  | 0.00015500  | -4.04085300 | 0.00000000 |
| C  | 0.00058000  | -5.26044300 | 0.00000000 |
| H  | 0.00113800  | -6.32630700 | 0.00000000 |

(HCCBr)<sub>2</sub> (180,90)

|    |             |             |            |
|----|-------------|-------------|------------|
| C  | 0.65659100  | 4.51989500  | 0.00000000 |
| C  | 0.39081300  | 3.32944700  | 0.00000000 |
| H  | 0.88902300  | 5.56012500  | 0.00000000 |
| Br | 0.00000000  | 1.57751600  | 0.00000000 |
| Br | -0.81925000 | -2.09802200 | 0.00000000 |
| C  | 0.93275000  | -2.48852900 | 0.00000000 |
| C  | 2.12333700  | -2.75368400 | 0.00000000 |
| H  | 3.16376900  | -2.98520700 | 0.00000000 |

(HCCBr)<sub>2</sub> (90,90)

|    |             |            |            |
|----|-------------|------------|------------|
| C  | -1.20902600 | 3.42381600 | 0.00000000 |
| C  | -0.23008600 | 2.69568400 | 0.00000000 |
| H  | -2.06434500 | 4.05976600 | 0.00000000 |
| Br | 1.20902600  | 1.62488900 | 0.00000000 |

|    |             |             |            |
|----|-------------|-------------|------------|
| Br | -1.20902600 | -1.62488900 | 0.00000000 |
| C  | 0.23008600  | -2.69568400 | 0.00000000 |
| C  | 1.20902600  | -3.42381600 | 0.00000000 |
| H  | 2.06434500  | -4.05976600 | 0.00000000 |

(C<sub>6</sub>H<sub>5</sub>Br)<sub>2</sub> (180,180)

|    |             |             |             |
|----|-------------|-------------|-------------|
| C  | 5.93540200  | -0.40826700 | 1.14135600  |
| C  | 4.53577100  | -0.40824000 | 1.14127800  |
| C  | 3.83622200  | 0.00005800  | -0.00016300 |
| C  | 4.53649600  | 0.40821500  | -1.14121000 |
| C  | 5.93612600  | 0.40796100  | -1.14050000 |
| C  | 6.63509400  | 0.00000300  | -0.00000800 |
| H  | 6.47911500  | -0.72525800 | 2.02753900  |
| H  | 3.98876600  | -0.72458800 | 2.02566300  |
| H  | 3.99005200  | 0.72467300  | -2.02590300 |
| H  | 6.47995100  | 0.72493100  | -2.02662300 |
| H  | 7.72203000  | -0.00001900 | 0.00005200  |
| Br | 1.94204900  | 0.00009600  | -0.00026800 |
| Br | -1.94213900 | -0.00005500 | 0.00015500  |
| C  | -3.83637600 | -0.00001800 | 0.00005000  |
| C  | -4.53599800 | -1.14148900 | -0.40804300 |
| C  | -4.53599800 | 1.14148100  | 0.40806500  |
| C  | -5.93562800 | -1.14146100 | -0.40812000 |
| C  | -6.63524900 | 0.00003800  | -0.00010500 |
| C  | -5.93562800 | 1.14150800  | 0.40798700  |
| H  | -3.98904700 | -2.02597900 | -0.72419300 |
| H  | -3.98904700 | 2.02594900  | 0.72427600  |
| H  | -6.47894500 | -2.02791300 | -0.72504000 |
| H  | -6.47894500 | 2.02798200  | 0.72484700  |
| H  | -7.72218500 | 0.00005900  | -0.00016500 |

(C<sub>6</sub>H<sub>5</sub>Br)<sub>2</sub> (180,90)

|    |             |             |             |
|----|-------------|-------------|-------------|
| C  | -4.95721300 | 0.68520000  | 1.21221100  |
| C  | -3.62820200 | 0.24607100  | 1.21213500  |
| C  | -2.96398300 | 0.02653400  | -0.00018600 |
| C  | -3.62898000 | 0.24619500  | -1.21205800 |
| C  | -4.95799000 | 0.68532500  | -1.21123600 |
| C  | -5.62159600 | 0.90465800  | -0.00003400 |
| H  | -5.47350800 | 0.85584500  | 2.15338500  |
| H  | -3.10842600 | 0.07437900  | 2.15120000  |
| H  | -3.10980700 | 0.07460000  | -2.15147500 |
| H  | -5.47441300 | 0.85590900  | -2.15235200 |
| H  | -6.65367900 | 1.24567800  | 0.00002500  |
| Br | -1.16513600 | -0.56783800 | -0.00028900 |
| Br | 2.31583700  | -1.71801500 | 0.00015100  |
| C  | 2.91009700  | 0.08049400  | 0.00005300  |
| C  | 3.12947600  | 0.74490000  | 1.21230000  |
| C  | 3.12971300  | 0.74468900  | -1.21226600 |
| C  | 3.56860500  | 2.07391100  | 1.21222700  |
| C  | 3.78822100  | 2.73810700  | -0.00009200 |
| C  | 3.56884300  | 2.07370000  | -1.21233900 |
| H  | 2.95766200  | 0.22527000  | 2.15142400  |
| H  | 2.95808300  | 0.22489600  | -2.15133300 |
| H  | 3.73897000  | 2.58987600  | 2.15363300  |
| H  | 3.73939200  | 2.58950100  | -2.15380100 |
| H  | 4.12924000  | 3.77019000  | -0.00014900 |

(C<sub>6</sub>H<sub>5</sub>Br)<sub>2</sub> (90,90)

|   |            |             |            |
|---|------------|-------------|------------|
| C | 4.40305300 | -0.61018900 | 1.21218600 |
| C | 3.24273900 | 0.17273100  | 1.21219400 |

|    |             |             |             |
|----|-------------|-------------|-------------|
| C  | 2.66270700  | 0.56406500  | -0.00012300 |
| C  | 3.24314000  | 0.17237700  | -1.21213500 |
| C  | 4.40345300  | -0.61054400 | -1.21151400 |
| C  | 4.98303400  | -1.00157300 | -0.00014000 |
| H  | 4.85382200  | -0.91431300 | 2.15335600  |
| H  | 2.78884000  | 0.47903200  | 2.15115100  |
| H  | 2.78955100  | 0.47840300  | -2.15133100 |
| H  | 4.85418300  | -0.91470600 | -2.15269000 |
| H  | 5.88406500  | -1.60954300 | -0.00014600 |
| Br | 1.09452500  | 1.62219400  | -0.00011200 |
| Br | -1.09459200 | -1.62214900 | 0.00000000  |
| C  | -2.66283000 | -0.56398200 | 0.00001100  |
| C  | -3.24286200 | -0.17264800 | -1.21230700 |
| C  | -3.24281100 | -0.17259900 | 1.21233600  |
| C  | -4.40317500 | 0.61027200  | -1.21229800 |
| C  | -4.98315600 | 1.00165600  | 0.00002700  |
| C  | -4.40312500 | 0.61032200  | 1.21234500  |
| H  | -2.78896200 | -0.47894900 | -2.15126400 |
| H  | -2.78887200 | -0.47886100 | 2.15128700  |
| H  | -4.85359400 | 0.91415900  | -2.15371300 |
| H  | -4.85350400 | 0.91424700  | 2.15376500  |
| H  | -5.88418800 | 1.60962600  | 0.00003400  |

(CBr<sub>4</sub>)<sub>2</sub> (180,180)

|    |           |           |           |
|----|-----------|-----------|-----------|
| C  | 0.000000  | 0.000000  | 0.000000  |
| Br | 0.000000  | 0.000000  | 1.944556  |
| Br | 1.833618  | 0.000000  | -0.647410 |
| Br | -0.917258 | 1.587701  | -0.647410 |
| Br | -0.918439 | -1.589745 | -0.648244 |
| Br | -2.556611 | -4.426339 | -1.805124 |
| C  | -3.474483 | -6.016281 | -2.453688 |
| Br | -5.307717 | -6.014922 | -1.805190 |
| Br | -3.473544 | -6.016628 | -4.398243 |
| Br | -2.557320 | -7.603453 | -1.804849 |

(CHBr<sub>3</sub>)<sub>2</sub> (180,180)

|    |           |           |           |
|----|-----------|-----------|-----------|
| C  | 0.000000  | 0.000000  | 0.000000  |
| Br | 0.000000  | 0.000000  | 1.939200  |
| Br | 1.816000  | 0.000000  | -0.680400 |
| H  | -0.517400 | 0.896200  | -0.355700 |
| Br | -0.907600 | -1.572100 | -0.681000 |
| Br | -2.558000 | -4.431700 | -1.920000 |
| C  | -3.465100 | -6.003900 | -2.601300 |
| Br | -5.293100 | -6.067200 | -1.957000 |
| Br | -3.500400 | -5.982600 | -4.540100 |
| H  | -2.932600 | -6.897400 | -2.261000 |

(CH<sub>2</sub>Br<sub>2</sub>)<sub>2</sub> (180,180)

|    |           |           |           |
|----|-----------|-----------|-----------|
| C  | 0.000000  | 0.000000  | 0.000000  |
| H  | 0.000000  | 0.000000  | 1.095800  |
| H  | 1.039100  | 0.000000  | -0.347900 |
| Br | -0.868900 | 1.578600  | -0.697100 |
| Br | -0.885300 | -1.608300 | -0.614600 |
| Br | -2.514000 | -4.568500 | -1.746200 |
| C  | -3.398700 | -6.177000 | -2.361100 |
| H  | -4.426900 | -6.174900 | -1.982000 |
| H  | -3.414000 | -6.168500 | -3.456800 |
| Br | -2.513200 | -7.758800 | -1.692800 |
